# Supplementary material for: RNA–peptide conjugate synthesis by inverse-electron demand Diels–Alder reaction
Source: Royal Society of Chemistry journal article supplement (doi:10.1039/c4ob00076e), 2014-01-01
Supplement: c4ob00076e1.pdf [file c4ob00076e1.pdf]

Electronic Supplementary Information

to

**RNA-peptide conjugate synthesis by inverse-electron demand  
Diels-Alder reaction**

Sandeep Ameta<sup>‡</sup>, Juliane Becker<sup>‡</sup> and Andres Jäschke\*

<sup>‡</sup>Both authors contributed equally

*Institute of Pharmacy and Molecular Biotechnology, Heidelberg University,  
Im Neuenheimer Feld 364, Heidelberg, 69120, Germany*

*\*E-mail: jaeschke@uni-hd.de*

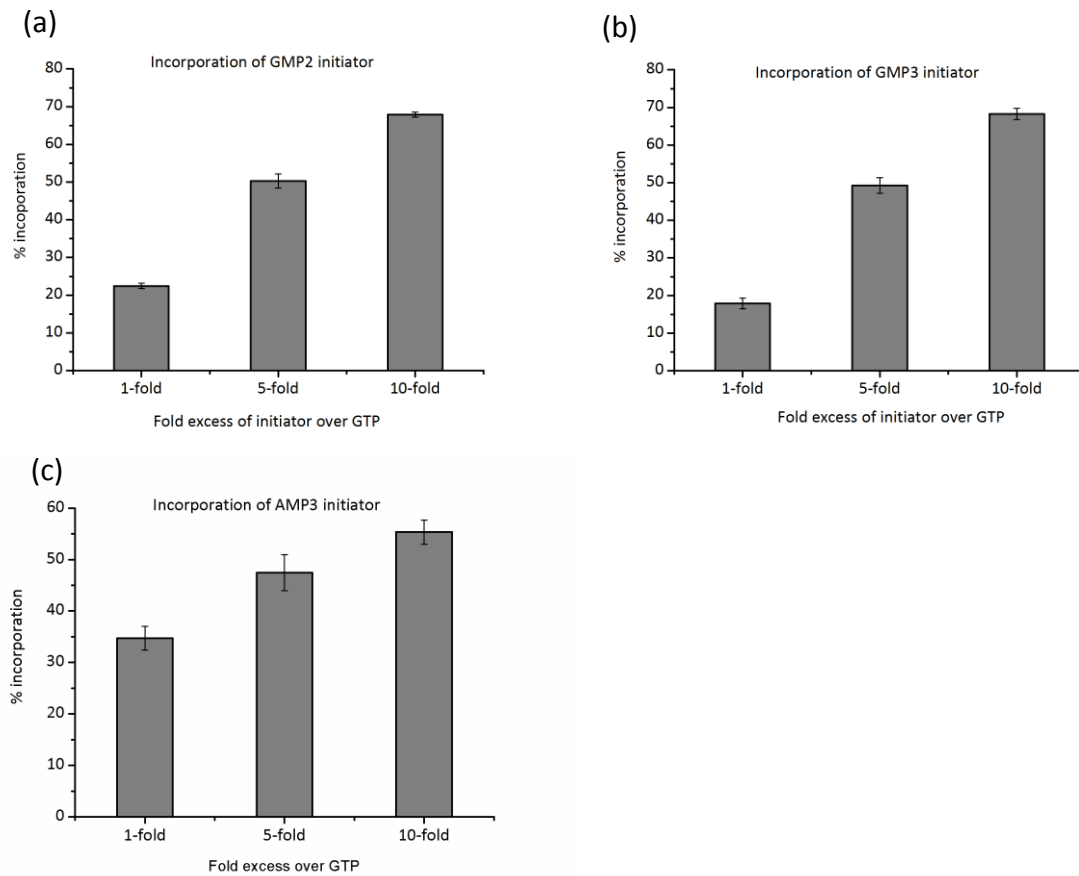

**Figure S1. Incorporation efficiency of different initiator nucleotides.** Graph showing the % incorporation of different initiator nucleotides, (A); GMP2 , (B); GMP3 & (C); AMP3 at the 5'-end of the 19mer RNA. Initiated and non-initiated 19mer RNA was analyzed by gel electrophoresis. Each incorporation was analyzed by performing transcriptions in triplicates and the average % incorporation together with standard deviation is plotted.

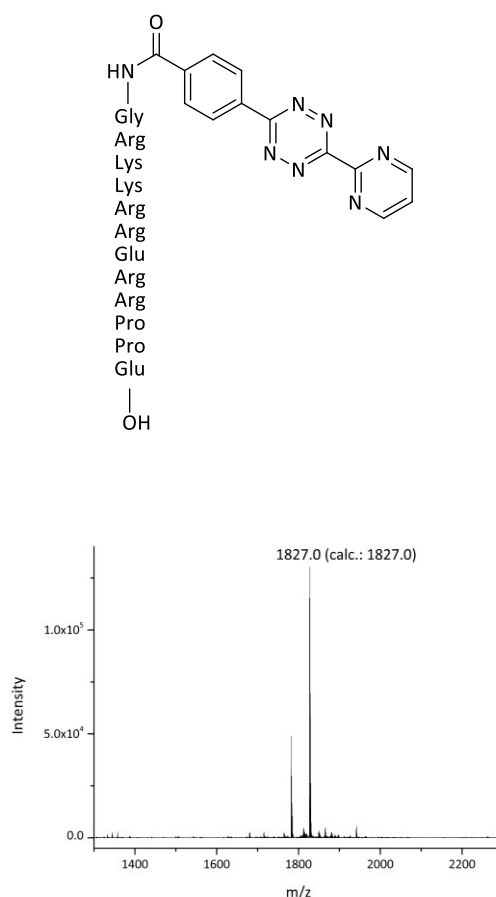

**Figure S2. Structure and Mass spectrum (ESI<sup>+</sup>) of tetrazine peptide.**

**(a) RNA19 sequence (232 nucleotides)**

5'-GGAGCUCAGCCUUCACUGCUGGCCCCUC**AU**UCUCCGACAAUGUACGACCUUG  
CAUAUACCGCUAGCACGAACGGUGUAGAUACCUGGAUCAUUACAACACCACGA  
UCUUCAAAUCGAAGAUGUUCGCAUGAUGUGCGCUAGCAAUAUAGUUUAGCGAG  
UAUAGCCGAACGCCGUGUUGAGUACCUAACGAUACCGGUGUGAGGUGCCUGUC  
UGGCACCACGGUCGGAUCCAC-3'

**(b) 10-23 DNzyme sequence**

5'-**CATTGTCGGAGAA**GGCTAGCTACAACGA**GAGGGGCCAGC**-3'

**Figure S3. RNA19 sequence and the designed 10-23 DNzyme.** (a) Complete sequence of 232 nucleotides long RNA19 ribozyme<sup>1</sup> with highlighted bases (bold and underlined) as the site of cleavage for the 10-23 DNzyme<sup>2</sup>. The DNzyme cleaves after A, generating a 29mer RNA fragment. (b) 10-23 DNzyme sequence designed for the site-specific cleavage of RNA19. The highlighted parts (grey) are the two RNA binding arms (13 and 11 nucleotides long) and in between are the 15 nucleotides long catalytic core.

**References**

1. S. Ameta and A. Jäschke, *Chem. Sci.*, 2013, **4**, 957-964.

2. (a) A. Roth and R. R. Breaker, *Annu. Rev. Biochem.*, 2009, **78**, 305-334; (b) M. J. Cairns, A. King and L. Q. Sun, *Nucleic Acids Res.*, 2003, **31**, 2883-2889.
